# Supplementary material
Source: publisher site journal article supplement (https://static.cambridge.org/content/id/urn:cambridge.org:id:article:S0332586523000021/resource/name/S0332586523000021supp001.pdf)
Supplement: Supplementary file 1 [file S0332586523000021supp001.pdf]

---

## SUPPLEMENTARY MATERIALS

### Analyzing the unrestricted Web: The Finnish Corpus of Online Registers

---

#### APPENDIX

##### 1. Examples of registers

**Texts have been shortened to save space. In addition, an English translation has been added after the original Finnish text. In the translation, an attempt has been made to preserve the style and tone of the original text, such as colloquialisms or grammatical errors.**

**Narrative general.** Salaperäinen puhelinsoitto ja mahdollinen itsemurha johtavat Scullyn pienen tytön luokse, jonka hän epäilee olevan hänen sisarensa, Melissan tytär. Scully ja hänen äitinsä matkustavat Bill Jr. asunnolle USA:n merivoimien tukikohtaan San Diegoon muutamia päiviä ennen joulua. Heitä on vastassa Bill Jr. ja hänen vaimonsa Tara, joka odottaa heidän ensimmäistä lastaan.

*A mysterious phone call and a possible suicide lead Scully to a little girl she suspects is her sister, Melissa's daughter. Scully and her mother travel to a apartment of Bill Jr. at a US marine base in San Diego a few days before Christmas. They are greeted by Bill Jr. and his wife, Tara, who are expecting their first child.*

**New reports/news blogs.** Tasavallan presidentti Niinistö Liettuassa: Energia ja Eurooppa-asiat esillä Liettuan valtiovierailulla. Energiayhteistyö ja ajankohtaiset Eurooppa-asiat ovat olleet esillä tasavallan presidentti Sauli Niinistön valtiovierailulla Liettuassa 14.-15. toukokuuta. Vierailun aluksi presidentti Niinistö kävi keskustelut Liettuan presidentin Dalia Grybauskaitin kanssa.

*President Niinistö in Lithuania: Energy and European affairs will be on the agenda during the Lithuanian state visit. Energy co-operation and current European affairs will be on the agenda during the state visit of the President Sauli Niinistö to Lithuania on May 14–15. At the beginning of the visit, President Niinistö had conversations with the president of Lithuania, Dalia Grybauskait.*

**Sports report.** Mikko Leikkanen pommitti Classicin liigakärkeen 19.01.2014 Mikko Leikkanen nousi pääosaan kun Classic siirtyi yksin Salibandyliigan kärkeen kaatamalla vieraisa Westend Indiansin 14-7 (3-1, 6-5, 5-1). Leikkanen laukoi ottelussa viisi maalia, joista ensimmäiset kolme jo ottelun avauserässä. - Tuli melkoinen ryöppypeli etenkin toisessa erässä, jossa ensin Indians teki monta peräkkäin, sitten me ja sitten taas Indians. Vasta viimeiselle 15 minuutille saimme vähän ehjempää peliä aikaiseksi, Classicin valmentaja Jarkko Rantala totesi.

*Mikko Leikkanen bombed Classic to the top of the league on January 19, 2014. Mikko Leikkanen took the lead when Classic moved to the top of the Floorball League alone, knocking down Westend Indians 14–7 (3–1, 6–5, 5–1). Leikkanen scored five goals in the match, the first three in the opening period of the match. "It was quite a game, especially in the second period, where first the Indians made many in a row, then us, and then again the Indians. It wasn't until the last 15 minutes when we got a little more impact in our game", Classic coach Jarkko Rantala stated.*

**Personal blog.** Niin monta kertaa oon kirjautunu sisään livejournaliin ja yrittänyt aloittaa kirjottamisen mut aina johonki se pysähtyy. Mut tällä kertaa kirjotan, kirjotan alusta loppuun. Yli 9 kk mun elämä on ollut Ranskassa. Mut en ees osaa laskea kuinka kauan mun sydän täällä on ollu. Ja paluu Suomeen (yritän keksiä jotain adjektiiviiä kuvaan suomee, mutten keksi nyt tässä heti) lähestyy ja pala musta jää tähän maahan ja sen ihmisiin...On aika kamalaa tajuta kuinka oon vaikuttanu erilaisten ihmisten elämään tän vuoden aikana.

*So many times I have logged into livejournal and tried to start writing but it always stops. But this time that I write, I write from the beginning to the end. My life has been in France for over nine months. But I don't know how long my heart has been here. And the return to Finland (I'm trying to come up with some adjectives to describe Finland, but I can't come up with any right now) is approaching and a piece of me will remain in this country and with its people. It's pretty awful to realize how I've affected the lives of different people this year.*

**Historical article.** Mutalan koulu on perustettu 1896. Tuolloin päätettiin kunnan kuntakokouksessa perustaa Mutalan ensimmäinen miesopettajan virka. Kuntakokous valitsi koululle myös johtokunnan, jonka tehtäväksi tuli hankkia alkavalle Mutalan kansakoululle huoneisto, kalusto ja koulutarpeet. Johtokunta vuokrasi huoneisto Kyöstilästä Tiitisen talosta ja koulu toimi siellä 3 vuotta.

*Mutala School was founded in 1896. At that time, it was decided at the municipal meeting to establish Mutala's first male teacher position. The municipal assembly also elected a board for the school, whose task was to procure an apartment, equipment, and school supplies for the new Mutala primary school. The board rented an apartment in Kyöstilä from Tiitinen's house, and the school operated there for three years.*

**Story.** Kaudella 2006-2007 Valley Bay Synchronics löytää vanhan vaatekaapin kautta tien salaperäiseen Narniaan. Satumaailmaa hallitsee julma Valkea Velho, joka on taikonut Narniaan ikuisen talven ilman joulua. Ennustuksen mukaan lumous murtuu, kun neljä ihmislasta nousee Cair Paravel -linnan valtaistuimille. Tätä velho ei tietenkään halua ja tekee kaikkensa estääkseen lapsia pääsemästä päämääräänsä.

*In the 2006–2007 season, Valley Bay Synchronics finds its way through the old wardrobe to mysterious Narnia. The fairy-tale world is ruled by the cruel White Wizard who has conjured an eternal winter without Christmas into Narnia. According to the prophecy, the enchantment will break when four human children take the throne of Cair Paravel Castle. Of course, the wizard does not want this, and does his best to prevent the children from reaching their goal.*

**Travel blog.** Elämää Maltalla. Aurinkoisia päiviä. Kävin Maltalle Suomesta palanneen kaverin ja hänen poikansa kanssa St. George's Bayn rannalla St. Ju-

liansissa viettämässä aikaa ja vähän aurinkoa ottamassa. Mereen en ole vieläkään uskaltanut mennä, koska tuntuu ettei vesi ole tarpeeksi lämmennyt, mutta rannalla lämpimän auringon alla ja pienessä merituulella oli kiva istuskella.

*Life in Malta. Sunny days. I went to Malta with a buddy – who had just returned from Finland – and his son on the shores of St. George’s Bay in St. Julian’s to spend some time together and sunbathe. I still didn’t dare to go to the sea because it feels like the water isn’t warm enough, but it was nice to sit on the beach under the warm sun and feel a little sea breeze.*

**Community blog.** Henkilökohtainen coachaus-sessio. Taneli Tikkan kanssa Osallistuiimme Somepitching.com liikeidea-kilpailuun. Kilpailun kovasta tasosta kertoo tuomareiden maineikkaus sillä mukana olivat mm. Harry Santamäki, Reidar Wasenius, Taneli Tikka ja Peter ‘Mighty Eagle’ Vesterbacka. Ideana kilpailussa oli tuottaa korkeintaan 2 minuutin mittainen hissipuhe-video jossa esitellään oma liikeidea. Onnistuimme menestymään liikeideallamme ja videollamme! Varsinaisen kilpailun aikana videomme keräsi reilusti eniten katsojia.

*Personal coaching session. Taneli Tikka and I participated in the Somepitching.com business idea competition. The hard level of the competition is shown by the reputation of the judges, because Harry Santamäki, Reidar Wasenius, Taneli Tikka and Peter ‘Mighty Eagle’ Vesterbacka were there. The idea in the competition was to produce an elevator speech video of up to 2 minutes in length, which introduces a business idea. We managed to succeed with our business idea and video! During the actual competition, our video garnered by far the most viewers.*

**Magazine/online article.** Päätoimittaja paljastaa: Tämän takia Halosta ei kutsuttu Valkoiseen taloon. Presidentti Tarja Halosta ei kutsuttu Yhdysvaltain valtiovierailulle Valkoiseen taloon pitkään aikaan ensimmäisen vierailun jälkeen. Sen on huhuttu johtuneen Halosen jyrkästä kannasta Irakin sotaan. Ex-päätoimittajalla on omat epäilyksensä. Ilta-Sanomien entinen vastaava päätoimittaja Martti Huhtamäki kertoo Studio55.fi-lähetyksessä, että päätös tehtiin ystäväysten kesken.

*The editor-in-chief reveals: For this reason, Halonen was not invited to the White House. During her visit to the United States, president Tarja Halonen was not invited to the White House for a state visit. It is rumored to be due to Halonen’s stern stance on the Iraq war. The ex-editor-in-chief has his own doubts. Martti Huhtamäki, former editor-in-chief of Ilta-Sanomat, says in a Studio55.fi broadcast that the decision was made among friends.*

**Opinion general.** Seksuaali- ja lisääntymisterveyden toimintaohjelmassa olisi tärkeää kytkeä seksuaalikehitys tunne-elämän kehitykseen. Terveiden ja hyvinvoinnin laitos on päivittänyt seksuaali- ja lisääntymisterveyden edistämisen ohjelman vuosiksi 2014-2020. Tavoitteena on seksuaali- ja lisääntymisterveyden edistäminen tietämystä lisäämällä, palveluja kehittämällä ja lisäämällä seksuaalikasvatusta niin, että se sisältyy kaikkeen kasvatukseen, opetukseen ja koulutukseen sekä terveyden ja hyvinvoinnin edistämiseen. Aikuisten tulisi seksuaalikasvatusta antaessaan osata ottaa huomioon seksuaalisuuteen liittyvät virheelliset tiedot ja uskomukset.

*In the Sexual and Reproductive Health Action Plan, it would be important to link sexual development to emotional development. The Department of Health and Welfare has updated the sexual and reproductive health promotion program for 2014–*

2020. *The aim is to promote sexual and reproductive health by increasing knowledge, developing services, and increasing sexuality education, so that it is included in all education, teaching and training, and the promotion of health and well-being. Adults should be able to distinguish between correct and incorrect information and beliefs related to sexuality when giving sex education.*

**Opinion blog.** Maailmassa on ikävä kyllä terroristiorganisaatioita. Meidän kaikkien olisi taisteltava niitä vastaan, eikä niitä pitäisi tukea. On törkeää, että hyökätään sattumanvaraisia syyttömiä siviilejä vastaan - olipa päämäärä sitten mikä hyvänsä. Näitä terroristijärjestöjä on runsaasti, mutta otan tähän esimerkkejä: 1. Al-Qaida ja sen läheiset järjestöt. He hyökkäävät ”vääräuskoisia” siviilejä vastaan. Oikeastaan kaikki muut, paitsi islamifundamentalistit ovat heidän vihollisiaan, jotka pitää tappaa.

*Unfortunately, there are terrorist organizations in the world. We should all fight them and not support them. It is outrageous to attack random innocent civilians – whatever the goal is. There are many of these terrorist organizations, but I will mention a few examples: 1. Al-Qaeda and its affiliates. They attack 'superstitious' civilians. Actually, everyone but Islamic fundamentalists are their enemies who have to be killed.*

**Review.** Onhan näitä tiluttajia, mutta sellainen maltti kuin Torkkiksella on puuttuu useimmilta. Vielä hiukan herkkyyttä ja ollaan Vinnie Mooren tasolla (alku tuotannon ohi on jo menty :) se tosin kasvaa tuo herkkyys elämäkokemuksen myötä. Veikkaisin että sitä on enemmän kuin keskiverto parikybäsellä. Taitavaa soittoa.

*After all, there are plenty of these guitar shredders, but they lack the kind of patience that Torkkis has. A little more sensitivity and we're at Vinnie Moore's level (the primary production we have already passed :) Admittedly, sensitivity increases with life experience. I'd guess it's more than the average 20-something dudes have. Skillful playing.*

**Religious text/sermon.** NELJÄS MOOSEKSEN KIRJA 23. Luku 1. Ja Bileam sanoi Baalakille: Rakenna minulle tähän seitsemän alttaria ja hanki minulle tänne seitsemän härkää ja seitsemän oinasta. 2. Niin Baalak teki, niinkuin Bileam käski. Ja Baalak ja Bileam uhrasivat härän ja oinaan kullakin alttarilla.

*THE FOURTH BOOK OF MOSES 23, Section 1. And Bileam said to Baalak, Build me here seven altars, and prepare me here seven oxen and seven rams. 2. And Balaak did as Bileam had commanded. And Baalak and Bileam sacrificed oxen and rams on every altar.*

**Advice.** Viikkohoroskooppi viikolle 45/2011. Marsin oppositio Neptunukselle värittää tämän viikon näkymättömillä väreillä. Kaikki tekeminen toimii nyt herkkien vivahteiden varassa ja jokaisen kannattaa varautua odottamattomiin yllätyksiin koko viikon ajan. Parhaiten selviää, jos malittaa hiukan meditoida tai hiljentyä päivittäin. Torstai 10.11.2011 Muista malittaa hiukan meditoida tai hiljentyä tänäänkin.

*Weekly Horoscope for Week 45/2011. The Mars opposition to Neptune colors this week with invisible colors. Everything you do now works on delicate nuances and everyone should be prepared for unexpected surprises throughout the week. It works best if you exercise a little to meditate or quiet down daily. Thursday*

11/10/2011 Remember to meditate a bit or quiet down today, as well.

**Informational description general.** Asuinkiinteiston tietoliikenneverkon uudistaminen -opas. Opas on hyödyllinen kaikille, jotka haluavat tietoa kiinteistöjen tietoliikenneverkoista. Kiinteistöliitto on Sähköinfo Oy:n kustantaman oppaan julkaisija yhdessä Isännöintiliiton, SANT:n, STUL:n ja Viestintäviraston kanssa.

*Residential Telecommunications Network Renewal Guide. This guide is useful for anyone who wants information about residential real estate telecommunication networks. Kiinteistöliitto is the publisher of the guide (funded by Sähköinfo Oy) together with Isännöintiliitto, SANT, STUL, and FICORA.*

**Job description.** Erityisopettaja Tehtävän kuvaus Omnian aikuisopisto hakee erityisopettajaa vakituiseen virkaan 1.10.2014 alkaen. Tehtäviin kuuluu mm. yksilö- ja ryhmäohjaus, opetus, oppimisvalmiuskartoitukset, opiskelijavalinta Omnian aikuisopiston ammatillisen koulutuksen tutkinnoissa sekä erityisopetuksen suunnittelu ja kehittäminen yhdessä muiden kouluttajien kanssa. Tehtävä edellyttää erityisopettajan pätevyyttä ja kokemusta erityisopettajan tehtävistä sekä työkokemusta aikuiskoulutuksen parissa.

*Special education teacher. Description of the task. Omnia Adult Education Center seeks a special education teacher for a permanent position as of October 1, 2014. Tasks include, for example, individual and group counseling, teaching, learning readiness surveys, student selection in Omnia Adult Education Vocational Education Degrees, and planning and development of special education together with other educators. The position requires the qualification and experience of a special education teacher, as well as work experience in adult education.*

**FAQ.** Miksi en saa vielä postia uusiin sähköpostitileihini? Kun olet lisännyt tai päivittänyt toimialueesi DNS-tietueet, muutosten voimaantulo saattaa kestää jopa 72 tuntia. Tämä johtuu siitä, miten päivitykset liikkuvat DNS-järjestelmässä. Voit käyttää toimialuenameäsi palveluiden kanssa yleensä viimeistään 72 tunnin kuluttua.

*Why can't I still receive mail in my new email accounts? Once you've added or updated your domain's DNS records, it can take up to 72 hours for the changes. This is because of how updates move in the DNS system. You can usually use your domain name with the services after 72 hours.*

**Description of a thing.** Fluxx Fluxx on korttipeli, jota pelataan peliä varten suunnitelluilla korteilla. Versioita on useita, esimerkiksi tavallinen, zombie- ja marsilaisversio. Huhuja liikkuu myös itse kehitellyistä versioista, koulun käytävillä voi nähdä pelattavan esim. ”steampunk-fluxxia”. *Fluxx Fluxx is a card game played with cards designed for the game. There are several versions, such as the regular, zombie, and Martian version. Rumors are also circulating about self-developed versions, in the corridors of schools it's possible to see people play, for example, 'steampunk-fluxx'.*

**Information blog.** class: Miscellaneous TNT toimitti vihdoinkin uuden iMacin tänään. Alkukokemukset olivat oikein positiivisia, pientä Software Updateen liittyvää katastrofia lukuunottamatta. Mac OS X yritti nimittäin heti päivittää itsensä versioon 10.4.10, ja jostain syystä (taustalla oli mm. iChat webcameineen pyörimässä) päivitys jäi jumiin, jonka jälkeen kone buuttaili vain kernel paniciin. No, system restore -levyillä asia korjaantui ja päivitys meni läpi. Sen jälkeen Macci

toimii kuten voi odottaakin, eli koneen perusasetukset WLANia ja webcamilla napattua profiilikuvaa myöten hoituvat parissa minuutissa.

*class: Miscellaneous TNT finally delivered my new iMac today. The first experiences were very positive, with the exception of a small disaster related to the Software Update. Mac OS X immediately tried to upgrade itself to version 10.4.10, and for some reason (e.g., iChat with webcams was running in the background) the update got stuck, after which the machine only booted into the kernel panic. Well, on the system restore disks, the issue was fixed and the update went through. After that, my Mac works as you would expect, i.e., the basic settings of the machine, including the WLAN and the profile image captured with the webcam, are taken care of in a couple of minutes.*

**Description of a person.** Olen 26v nuori poika, laulan ja soitan perkussioita, kitaraa sekä pianoa. Opiskelen tällä hetkellä onnellisesti Helsingissä, Metropolia AMK:ssa, pop/jazz laulu pääaineena.

*I am a 26 year old young boy, I sing and play percussion, guitar and piano. I am currently happily studying popjazz singing as a major in Helsinki, Metropolia University of Applied Sciences.*

**Research article.** Työn tarkoituksena oli kehittää voimansiirtotulosyksikön tavoiteliikeidea. Tavoitteena olivat tulosyksikön kannattavuuden ja elinvoimaisuuden parantaminen niin lyhyellä kuin pitkälläkin aikavälillä. Nykyisen liikeidean kuvaamiseksi selvitettiin voimansiirtotulosyksikön tapa toimia. Tavoiteliikeidean löytämiseksi analysoitiin voimansiirtotulosyksikköä ja sen ympäristöä useilla eri yrittäjäanalyysillä.

*The purpose of the work was to develop a target business idea for the transmission business unit. The goal was to improve the profitability and viability of the business unit in both, the short and long term. In order to describe the current business idea, the way in which the transmission business unit operates, was investigated. To find the target business idea, the transmission business unit and its environment were analyzed using several different business analyses.*

**Legal terms/conditions.** Valtioneuvoston päätös maatalousyrittäjän vuosiloman pituudesta 1 § Maatalousyrittäjän lomituspalveluista annetussa laissa (2/85) tarkoitetulla maatalousyrittäjällä on oikeus saada lomittaja vuosiloman ajaksi, jonka pituus on 1,5 työpäivää jokaiselta täydeltä lomanmääräytymiskuukaudelta. Jollei lomapäivien luvuksi tule kokonaislukua, päivän osa katsotaan täydeksi lomapäiväksi.

*Decision of the Government on the length of the annual leave of an agricultural entrepreneur 1 § An agricultural entrepreneur farmer according to the Act on Replacement Services for Agricultural Entrepreneurs (2/85) has the right to receive a stand-in for the duration of annual leave of 1.5 working days for each full month of leave. If the total number of vacation days is not a whole number, partial days are considered full vacation days.*

**Course material.** Entsyymit teollisuudessa Miksi entsyymejä käytetään? Teollisuudessa entsyymit saavat aikaan energiasäästöjä, kuten muutkin katalyytit. Lisäksi säästetään laitehankinnoissa, kun vältetään kalliiden painetta ja korroosiota kestävien laitteistojen käytöltä. Tuotantoprosessin tehokkuus kasvaa ja syntyy taloudellisia säästöjä, kun entsyymejä käyttämällä vältetään tarpeettomilta sivutuotteilta.

*Enzymes in industry Why are enzymes used? In industry, enzymes, like other catalysts, provide energy savings. In addition, savings are made in equipment purchases by avoiding the use of expensive pressure- and corrosion-resistant equipment. The efficiency of the production process increases and financial savings arise when unnecessary by-products are avoided by using enzymes.*

**Encyclopedia article.** Roberto Luongo Tämän artikkelin tai sen osan kieliasua on pyydetty parannettavaksi. Voit auttaa Wikipediaa parantamalla artikkelin kieliasua. Luongo oli jo juniorina suuri lahjakkuus. New York Islanders varasi hänet ensimmäisellä kierroksella, vuonna 1997. Hänet varattiin neljäntenä pelaajana. Vauruksen jälkeen kului kaksi kautta, ennen kuin hän siirtyi Islandersin organisaatioon. Kaudeksi 2000–2001 Luongo siirtyi Olli Jokisen kanssa Florida Panthersiin.

*Roberto Luongo. It has been requested that the grammar of this article be improved. You can help Wikipedia by improving the language of the article. Luongo was already a great talent as a junior. New York Islanders drafted him in the first round, in 1997. He was drafted as the fourth player. It took two seasons after the draft before he joined the Islanders organization. For the 2000–2001 season, Luongo was traded to Florida Panthers with Olli Jokinen.*

**Report.** Valtiokonttori/Valtion IT-palvelukeskus ( VIP ) on tehnyt 22.6.2011 Väestörekisterikeskuksen ( VRK ) kanssa puitesopimuksen ( VRK 2179/2401/11 ), joka koskee valtionhallinnon varmennepalvelujen ja toimikorttien hankkimisessa noudatettavia periaatteita ja menettelyjä sekä eräitä muita ehtoja, jotka asiakkaat voivat saada hyväkseen, kun ne tekevät VRK:n kanssa puitesopimukseen perustuvat asiakassopimukset.

*On 22, June 2011, the State Treasury/State IT Service Center (VIP) entered into a framework agreement (VRK 2179/2401/11) with the Population Register Center (VRK) concerning the principles and procedures to be followed in obtaining state administration certificate services and smart cards, as well as certain other conditions when concluding customer agreements with VRK based on a framework agreement.*

**Interactive discussion general.** Näyttää feedin #652 Hyvin kirjoitettu. Ei tuohon paljon ole lisättävää. Jalkapallossa voi toki voittaa ”huonomminkin pelaajilla” tiettyyn rajaan saakka . Tämän vuoksi kilpailun ja menestymisen käsitteet ovat haastavia. Yksilön ja jou... Lue lisää

*Displays feed #652. Well written. There is not much to add to that. In football, of course, you can win with 'worse players' up to a certain limit. This is why the concepts of competition and success are challenging. Individual and crew ... Read more*

**Discussion forum.** Meikä on usein ihmetelty, että minkä takia nuo futarit puree, raapii ja puskee toisiaan? Jos alkaa ankarasti vituttamaan, niin eikö se olisi ihan sama kiskasta nyrkillä naamaan? En turpiin mätkimistä kannata, mutta onhan nuo puremiset ja puskemiset kuitenkin pikkutyttöjen hiekalaatikkomeininkiä .

*I've often wondered why those football players bite, scratch and headbutt each other? If you start to get so fuckin' annoyed, wouldn't it be exactly the same to hit with a bare fist? I don't support beating, but after all, those bites and butts are for little girls .*

**Question-answer forum.** Kysymys: ikkunan huurtuminen Ikkunat ja ovet heimeillä talo v. 63 rakennettu. ulkoseissä mineriitti. vanhat ikkunat niistä on kysymyksenikin joka kuuluu mitä pitäisi tehdä kun sisäpinnassa on huurtumista ja kosteutta tälläkin hetkellä jo ilmiö tulee öisin päiväsaikaan ei sitä ole. onko ikkunanvaihto edessä. talossa kokonaan sähkölämmitys. ikkunat kaksilasiset.

*Question: window fogging. Windows and doors. hello we have a house built in 1963 and the outer walls of mineralite. old windows too and here's the question: what should be done when there is still fogging and moisture on the inner surface? is the window replacement up front? in the house completely electric heating. the windows double-glazed.*

**How-to/instructions.** Toimiston eteen tulevat raitiovaunut 1 ja 7 sekä kaikki Tuusulantien suuntaan kulkevat bussit. Pysäkki: Mäkelänrinne. Autolla saapuville pysäköintipaikkoja on molemmin puolin Mäkelänkatua.

*Trams 1 and 7 and all buses in the direction of Tuusulantie will arrive in front of the office. Stop: Mäkelänrinne. For those arriving by car, there are parking spaces on both sides of Mäkelänkatu.*

**Recipe.** Sekoita marmeladi ja vanilja ja laita seosta nokare neliöiden keskelle. Käännä kulmat keskelle yhteen ja nipistä kiinni. Laita pullat paperivuokiin ja anna kohota liinan alla noin 1 1/2 tuntia. Voitele pullat munalla, ja paista 225-asteisessä uunissa noin 10 minuuttia. Ota kakku uunista ja nosta lämpö 200 asteeseen. Levitä ananasmurska kakulle ja laita kookosseos nokareina tasaisesti päälle.

*Mix the marmalade and vanilla and place the mixture in the middle of the squares. Fold the corners to the middle together and pinch. Put the buns in paper trays and let them rise under a cloth for about 1.5 hours. Grease the buns with egg, and bake in a 225 degree oven for about 10 minutes. Take the cake out of the oven and raise the heat to 200 degrees. Spread the pineapple crumbs on the cake and place the coconut mixture evenly on top.*

**Informational persuasion general.** Indexin hyvinvointipäivä 6.5. On hyvä kiinnittää huomiota omaan hyvinvointiinsa osallistumalla Indexin hyvinvointipäivään! Maanantaina 6.5. klo 16 lähtien pelaamme yhdessä pihapelejä Index-kartanon pihalla, sateen sattuessa siirrytään sisälle kartanoon Trivial Pursuitin tai muiden lautapeliin pariin.

*Index Welfare Day 6.5. It is good to pay attention to well-being by participating in Index's well-being day! Monday 6.5. from 4 p.m. we will be playing yard games together in the yard of Index Manor, and in case of rain, we will move inside the manor to play Trivial Pursuit or other board games.*

**Description with intent to sell.** Varastomme sijaitsee Helsingin Herttoniemessä. Kotimaisuus on etumme: pystymme reagoimaan nopeasti asiakkaiden tarpeisiin ja takaamaan sujuvat tavarantoimitukset. Ennen kello 15:tä vastaanotetut tilaukset toimitamme jo seuraavaksi päiväksi mihin tahansa päin Suomea. Kustannustehokkaat materiaalit: Toimitamme suun terveydenhuollon ammattilaisille kaikki tarvittavat tarveaineet.

*Our warehouse is located in Herttoniemi, Helsinki. Domesticity is our advantage: we are able to respond quickly to customer needs and guarantee smooth deliveries. Orders received before 3 p.m. will be delivered to the next day anywhere in*



*Finland. Cost-effective materials: we supply all the necessary supplies for health-care professionals.*

**News-opinion blog/editorial.** Pk-yritykset ovat avainasemassa. Tuoreen pk-yritysbaremetrin mukaan pienet ja keskisuuret yritykset suhtautuvat tulevaisuuteen toiveikkain mielin. Liikevaihdon kasvu ja kannattavuuslukujen parantuminen kasvattavat luottamusta. Niiden turvin rohkaistutaan henkilöstölisäyksiinkin. Erityisen hyvältä tuntuu huomata, että Varkauden seudun pk-yritysten liikevaihto ja kannattavuus ovat valtakunnallisten keskiarvojen yläpuolella. Pienet ja keskisuuret yritykset ovat työllisyyden ja hyvinvoinnin avaintekijöitä, ja niiden merkitys on kotimarkkinoiden kasvulle ja kehitykselle kiistaton.

*SMEs play a key role. According to the recent SME Barometer, small- and medium-sized enterprises are optimistic about the future. Growth in net sales and improved profitability figures increase confidence. They encourage to staff increments. It feels particularly good to note that the turnover and profitability of SMEs in the Varkaus region are above national averages. Small- and medium-sized enterprises are key to employment and prosperity, and their importance for the growth and development of the domestic market is undeniable.*

**Poem.** Tuolloin on kaikki vuodenvaihteen voimat monin verroin raikkaampina ympärillä, voimme antaa kevään voiman nostaa tanssia, ottaa meitä kädestä ja lennättää meidät toisiin galakseihin... antaa sydäntemme toiveiden tulla kuulluiksi, antaa rakkautemme kantaa voima ympäri maailman...

*At that time, all the forces of the cycle are many times fresher around us, we can give Spring the power to dance, take us by the hand, and fly us to other galaxies... let our hearts wish to be heard, let our love carry power around the world...*

**Interview.** Asiakashaastattelu: Oscar Huarte, Lizarten toimitusjohtaja. Mikä sai teidät ryhtymään yhteistyöhön Expense Reduction Analystsin kanssa? Tiesin Expense Reduction Analystsin toiminnasta, sillä olin nähnyt siitä esityksen Navarran kauppakamarissa ja yllätynyt heidän toimintamallista. Vuosi tämän ensitapaamisen jälkeen harkitsin, olisiko meillä tarvetta yrityksessä soveltaa kyseistä toimintamallia, ja mietin heidän lähestymistapaansa, ammattitaitoaan ja alan asiantuntemustaan. Mikä on teille positiivisinta suhteessanne Expense Reduction Analystsiin? Heidän lähestymistapaansa projektissa ja monialainen tiimi, joka toimii eri kuluryhmissä.

*Customer Interview: Oscar Huarte, CEO of Lizarte. What made you collaborate with Expense Reduction Analysts? I knew about the work of the Expense Reduction Analysts because I had seen a presentation at the Navarre Chamber of Commerce and was surprised by their approach. A year after this first meeting, I considered whether we would need a company to apply that approach, and I thought about their approach, professionalism, and expertise in the field. What is most positive in your relationship with Expense Reduction Analysts? Their approach to the project and a multidisciplinary team working in different cost groups.*

**Formal speech.** Hallituksen ja työmarkkinaosapuolten tänään solmima historiallinen työllisyys sopimus on ensiluokkaisen tärkeä Suomelle nyt, kun maailmantalous on haastavassa tilanteessa. Haluan onnitella pääministeri Kataista rakentavan ja tulevaisuusorientoituneen ratkaisun löytymisestä ja kysyä pääministeriltä: Mitkä ovat työllisyys sopimuksen keskeiset konkreettiset keinot suomalaisen kilpailukyyn

ja työllisyyden turvaamiseksi?

*The historic employment agreement signed today by the government and the social partners is extremely important to Finland, now that the world economy is in a challenging situation. I would like to congratulate Prime Minister Katainen on finding a constructive and future-oriented solution and ask the Prime Minister: What are the main concrete means of the employment pact to secure Finnish competitiveness and employment?*

**Machine-translated/generated text.** Yleiset, kaupungeissa, jotka ovat Englannin valioliiga ryhmien Etusivu on laadun jalkapallo, mutta silloinkaan ovat liian monia kaupunkeja käydä yhdellä. Voit päättää, mitkä kaupunkien on arvoltaan vierailevat tässä muutamia paras jalkapallo kaupungit, vierailta Yhdistyneessä kuningaskunnassa. Manchester monta faneille Manchester United on UK jalkapallo epitome.

*In general, cities that have English Premier League groups home have quality football, but even then there are too many cities to visit in one. To decide which cities are worth visiting here are some of the best football cities in the UK. Manchester for many fans Manchester United is the UK football epitome.*

## 2. Examples of hybrids.

**Texts have been shortened to save space. In addition, an English translation has been added after the original Finnish text. In the translation, an attempt has been made to preserve the style and tone of the original text, such as colloquialisms or grammatical errors.**

**Machine-translated/generated text & Review.** Mielipide JVC GZ EX310 :sta Sen käyttäjät pitivät tuotetta JVC GZ EX310 hyvin käyttäjäystävällisenä. He pitivät sitä hyvin luotettavana.

*JVC GZ EX310 Reviews. Its users find JVC GZ EX310 very user-friendly. They find it very reliable.*

**News report/news blog & Description with intent to sell.** Aluelämpö panostaa uusiutuvien kotimaisten ja paikallisten polttoaineiden käyttöön energian hankinnassa. Adven on luotettavia energiaratkaisuja ja kaukolämpöä toimittava energiayritys. Lähes kaikki ovat samaa mieltä tässä kohdassa.

*Regional Energy invests in the use of renewable domestic and local fuels in energy procurement. Adven is an energy company that provides reliable energy solutions and district heating. Almost everyone agrees on this point.*

**Description with intent to sell & How-to/instructions.** Hieronnan avulla voit lievittää stressiä ja poistaa jännitystä. Hieronta lievittää lihaksien jännitystä ja vähentää kipuja. Hieronta vilkastuttaa myös aineenvaihduntaa ja antaa virkeän mielen.

*A massage allows you to relieve some stress and remove tension. A massage relieves muscle tension and reduces pain. A massage also stimulates the metabolism and gives you a fresh mind.*

**News report/news blog & Informational persuasion general.** Kirkkopuistoon leikkimökkejä ja crossfit-kenttä. Jyväskylään Kirkkopuiston paraatiaukiolle rakennetaan tällä viikolla viisi leikkimökkiä. Ensi viikolla puistoon pystytetään

myös kenttä crossfitin harrastamiseen. Leikki- ja harrastuspaikoilla halutaan lisätä kaupunkikeskustan viihtyisyyttä.

*Playhouses and a crossfit court will be built in the church park. Five playhouses will be built in Kirkkopuisto Parade Square in Jyväskylä this week. Next week, a field will also be erected in the park for crossfit. Play and leisure venues are intended to increase the comfort of the city center.*

**Discussion forum & Story.** Tyytyväisenä Ranma söi piirakanpalansa. Tyttö nousi penkiltään. ”Ei tuo ole hyvä, ellet sitten välttämättä tahdo omaa kuvaasi kaulaasi roikkumaan.” Sen keskellä oli pieni tekojalokivi. Tyttö ojensi sen Akanen käteen. ”Tämä näyttäisi kauniimmalta kaulassasi.”

*Satisfied, Ranma ate her pie. The girl got up from her bench. ”That’s not good unless you necessarily want your own picture to hang around your neck”. There was a small rhinestone in the middle of it. The girl handed it to Akane. ”This would look more beautiful on your neck”.*

**Personal blog & Review.** Otin ne esiin siksi, että Star Trek ja Mass Effect ovat hyviä esimerkkejä tieteistarinoista, joissa keskeisen miljööän muodostavat avaruusalus. Pidän tätä hyvänä ja vakaana asetelmana tilanteessa, jossa muuten kuljetaan käytännössä rajaamattomassa avaruudessa. Avaruusalus ja sen puitteissa toimiva keskeinen henkilökaarti tuo olennaista vakautta suhteessa muuten alati muuttuvaan ympäristöön.

*I brought them up because Star Trek and Mass Effect are good examples of science stories where the spacecraft forms a central milieu. I consider this to be a good and stable setup in a situation where otherwise you are traveling in virtually unlimited space. The spacecraft and the central personnel guard operating within it provide essential stability in relation to an otherwise ever-changing environment.*

**Personal blog & Recipe.** Teimme taikinan ja laitoimme purkin jääkaappiin. Eilen Toivolan Vanhalta Pihalta ostamamme laukaalaisen Niemelän tilan lampaanlihat kypsyivät taginepadassa. Tötteröpadan laskeutuminen kirjahyllyn päältä hellalle on aina lupaus siitä, että parin tunnin päästä on luvassa tuoksuva herkkua. Ruskista lihapalat voin ja auringonkukkaöljyn seoksessa (tai pelkästään jommassakummassa) (kahdessa osassa jos eivät mahdu kerralla pataan). Lisää porkkanat, sipulit, ras el hanout, saffroni ja suola. Lisää sitruunat ja vettä niin paljon, että lihat melkein peittyvät. Hauduta kannen alla tunti. Lisää perunat ja hauduta toinen tunti.

*We made the dough and put the jar in the fridge. The mutton from the Niemelä farm in Laukaa, which we bought yesterday from Toivola’s Old Yard, cooked in a tagine pot. The descent of the cone pot from the top of the bookshelf into the stove is always a promise that in a couple of hours there will be a fragrant delicacy. Brown the pieces of meat in a mixture of butter and sunflower oil (or just one of them) (in two parts if they don’t fit in the pot at once). Add carrots, onions, ras el hanout, saffron, and salt. Add the lemons and enough water to cover the meat. Simmer with a lid for an hour. Add the potatoes and simmer for another hour.*

**How-to/instructions & Description of a thing.** Peli toimii sillä periaatteella, että jokainen kerta kun sivustolle saavutaan, järjestelmä arpoo sanakatalogista jonkin sanan ja asettaa sen arvattavaksi. Jos pelaaja älyää mikä sana alaviivoista muodostuu, hän voittaa pelin eikä kukaan päädy hirteen. Osa hirsipuupelin sanoista

on pelaajien itsensä ehdottamia. Peli lienee syntynyt Britanniassa viktoriaanisella kaudella ja pelin tiettävästi ensimmäinen kirjallinen maininta löytyy vuodelta 1894 eräästä Alice Bertha Gommen pelikirjasta.

*The game works on the principle that every time you reach the site, the system draws a word from the word catalog and sets it up to guess. If the player understands which word is made up of the underscores, he wins the game and no one ends up hanging. Some of the words in the log game are suggested by the players themselves. The game probably originated in Britain during the Victorian period. The first written mention of the game is in 1894 in an Alice Bertha Gomme game book.*

**How-to/instructions & Informational description general.** Saattohoitoa toteutetaan potilaan tarpeiden ja toiveiden mukaisesti kotona, palvelutaloissa, vanhainkodeissa ja muissa asumisyksiköissä, sairaaloiden vuodeosastoilla sekä saattohoitokodeissa. Lasten saattohoito on erikoissairaanhoidon vastuulla. Sairaanhoidopiirit ovat vastuussa saattohoitopotilaiden hyvän hoidon yhdenvertaisesta organisoimisesta ja toteuttamisesta. Saattohoitopotilaalle tarjotaan saattohoitopalvelut mahdollisuuksien mukaan siellä, missä hän on hoidossa tai asuu ja elää. Suositusten toteutumista edistetään käynnistämällä keskustelua hyvän saattohoidon merkityksestä ihmisen kuoleman lähestyessä.

*Hospice care is provided according to the patient's needs and wishes at home, in service homes, nursing homes and other housing units, in the wards of hospitals, and in nursing homes. Hospice care for children is the responsibility of specialist nursing care. Hospital districts and are responsible for the equal organization and implementation of good care for inpatients. Hospice care is provided to the patient where possible, where he or she is in care or lives and lives. The implementation of the recommendations will be promoted by launching a debate on the importance of good hospice care as patients approach death.*

**3. Example of a misclassified text. The sample is an editorial but classified as an opinion blog. The text is shortened to save space, and an English translation has been added after the original Finnish text:**

Monet ekonomistit ennakoivatkin ylivelkaantuneille Japanin kaltaista vuosikymmenen mittaista taantumaa. Halutaan kuvitella - joko tarkoituksellisesti tai tiedostamatta, hyvän kehityksen tai hyvän asian toteutuvan vaikkei realistisia edellytyksiä asian toteutumiselle ole. Hyvä tahto ja optimismi ovat joskus paikallaan, mutta ei jos realismi unohtuu. Yritetään antaa vaikutelma että hyvin menee, vaikka talouden faktat puhuvat aivan toista ja vetkutellaan äänestäjien pelossa välttämättömien korjaustoimien tekemistä. Kuulostaako tutulta?

*Many economists predict a decade-long recession for over-indebted countries like Japan. We want to imagine - either intentionally or unconsciously, that good development or good things will happen, even if there are no realistic conditions for it to happen. A good will and optimism are sometimes necessary, but not if realism is forgotten. Attempts are being made to give the impression that things are going well, even though the facts of the economy speak quite differently, and there is a delay in taking the necessary remedial action in the fear of the electorate. Does it sound*

*familiar?*
